# Supplementary material for: Impacts of Outdoor Air Pollution on Human Semen Quality: A Meta‐Analysis and Systematic Review
Source: Hindawi journal article supplement (doi:10.1155/2020/7528901), 2020-01-01

## Supplement materials

**Figure S1. Sensitivity of each included study in this meta-analysis.** A-K indicated sensitivity analyses of semen volume, sperm concentration, total sperm count, normal morphology rate, progressive motility, total sperm motility, DFI, VCL, VSL and LIN respectively.

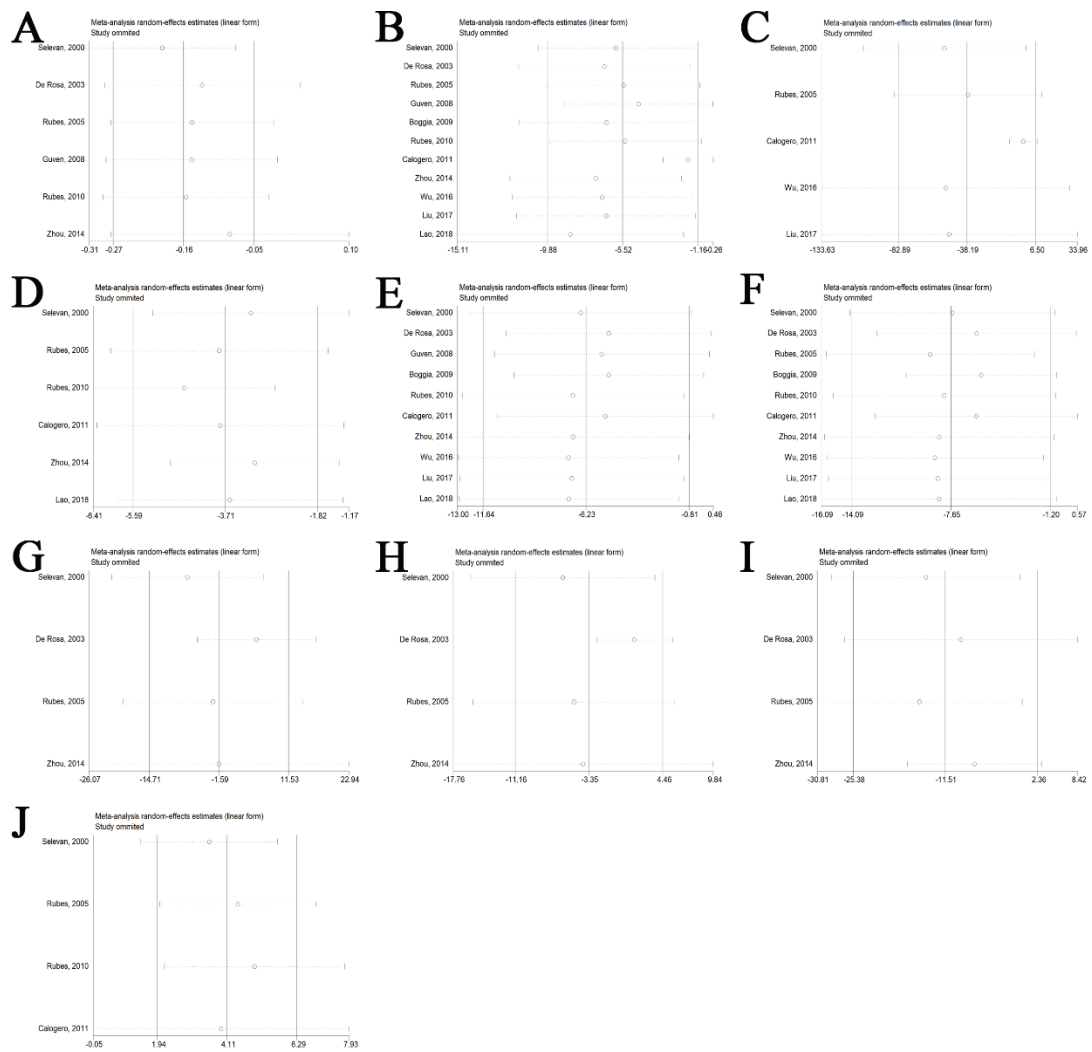

**Figure S2. Begg's funnel plots of the publication bias.** A-K indicated funnel plots of semen volume, sperm concentration, total sperm count, normal morphology rate, progressive motility, total sperm motility, DFI, VCL, VSL and LIN respectively.

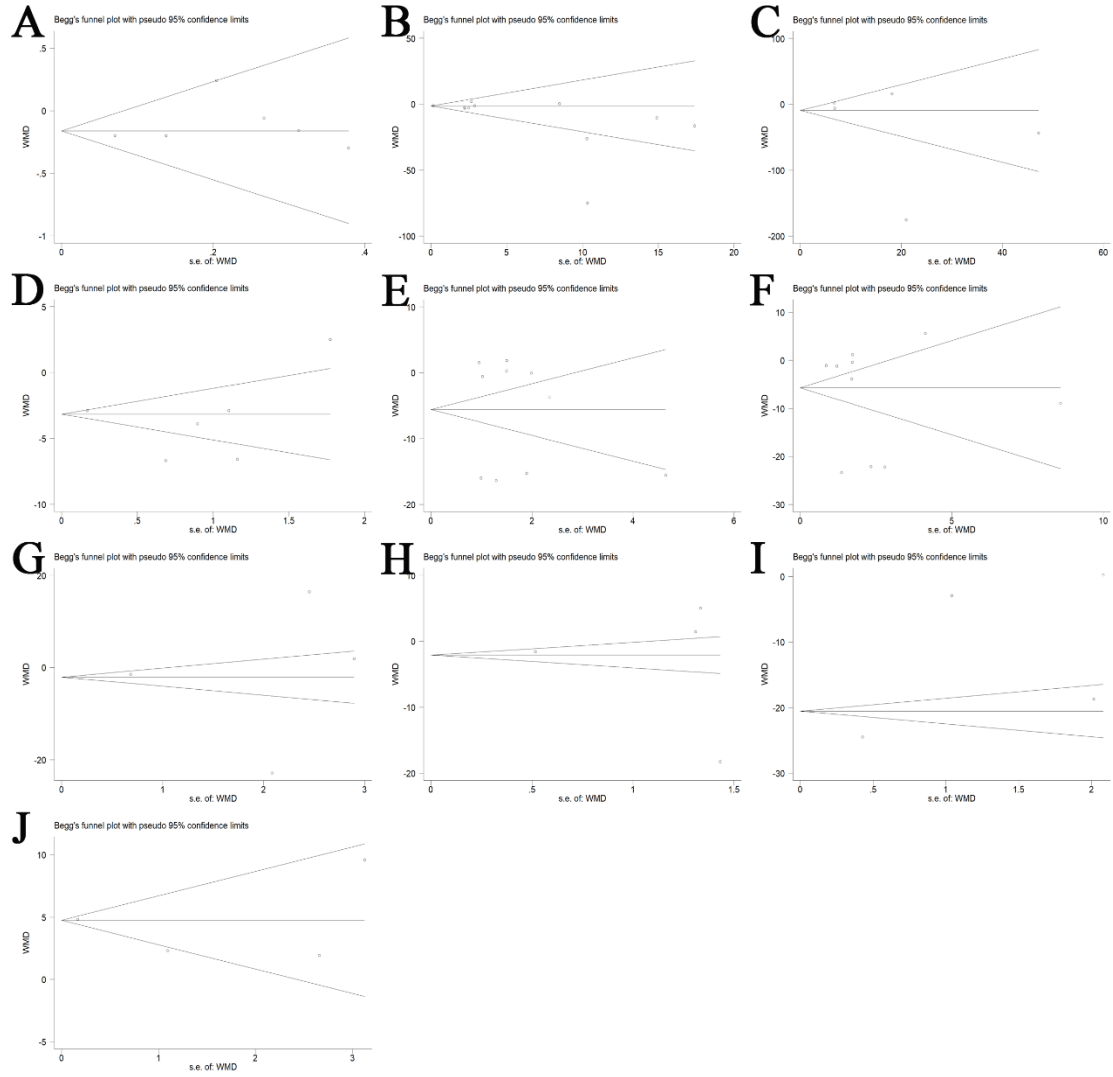

Supplement: f1 [file 7528901.f1.pdf]
